# Supplementary figures and images for: Applied ELT as a Panacea for Linguistic Imperialism
Source: Royal Society of Chemistry journal article supplement (doi:10.1039/b820818m), 2012-02-12

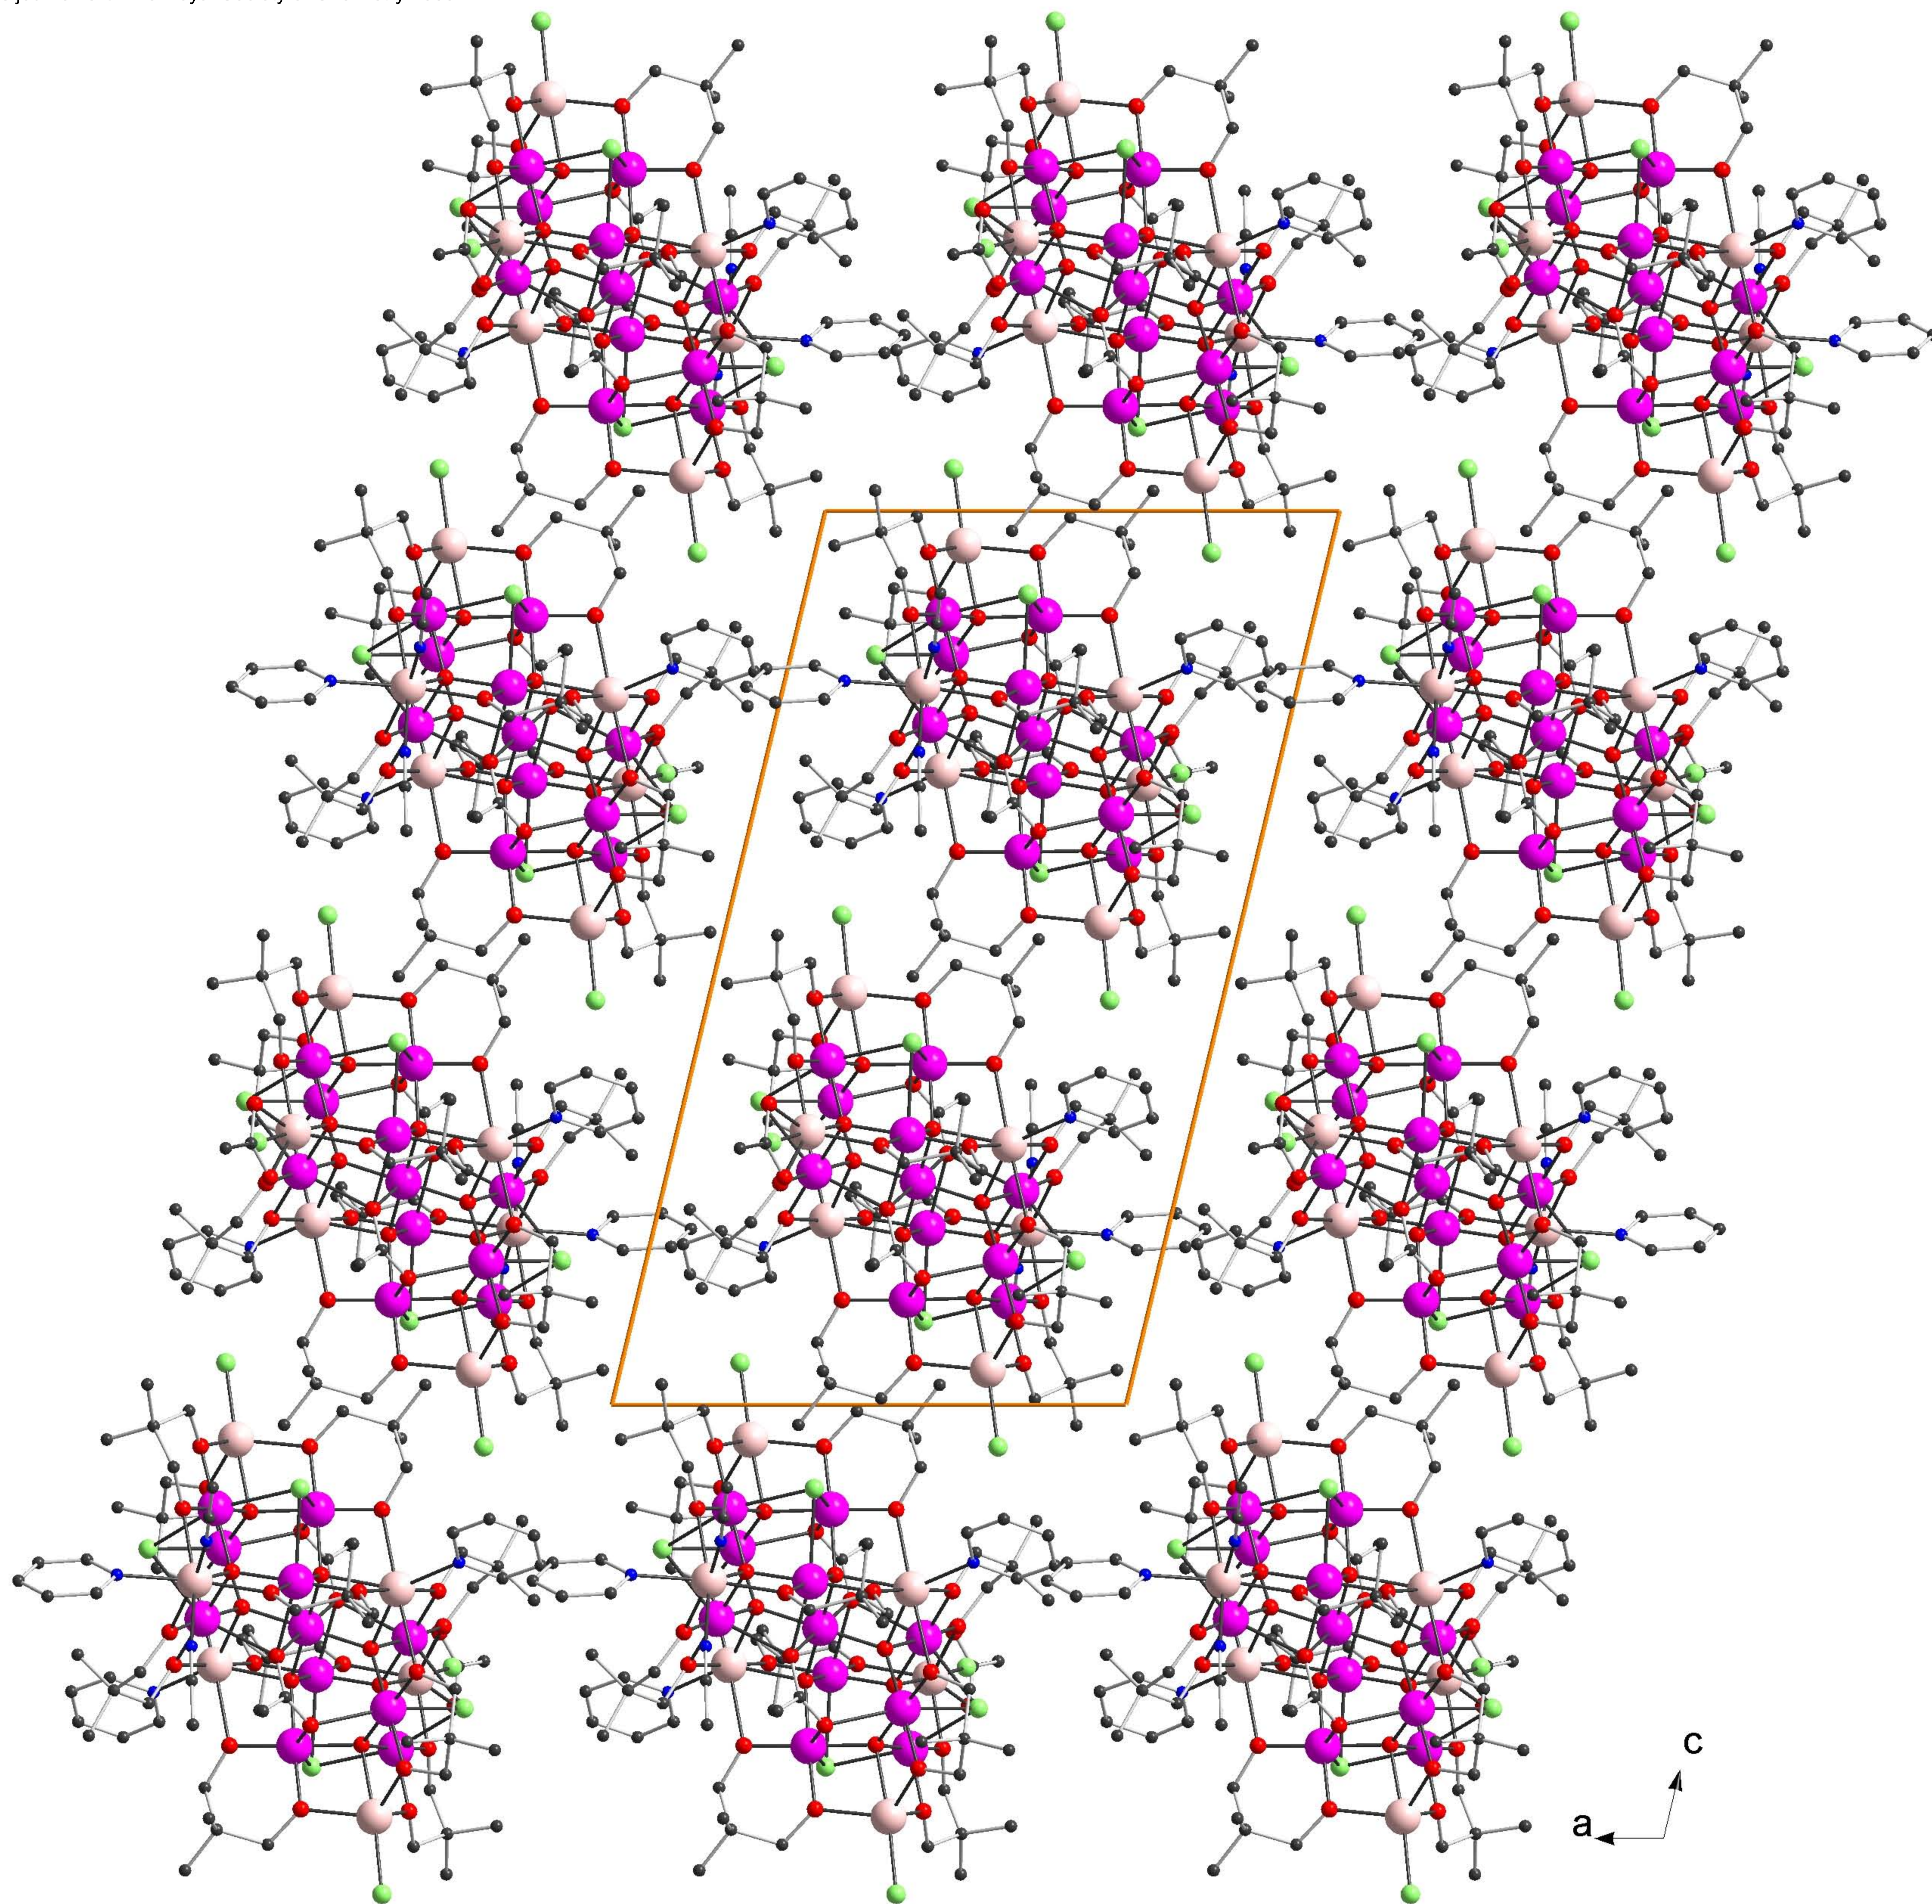

Supplement: b820818m.pdf [file b820818m.pdf]
